# Supplementary material for: The Clinical Findings, Pathogenic Variants, and Gene Therapy Qualifications Found in a Leber Congenital Amaurosis Phenotypic Spectrum Patient Cohort
Source: MDPI journal article supplement (doi:10.3390/ijms25021253), 2024-01-19
Supplement: s1 [file s1]

| Patient Database # | Gene     | Syndromic presentation if known | Age at LCA symptom onset or diagnosis if known | Age at which genetic testing was performed | Zygosity                       | Transcript  | Variant(s)                     | Variant classification per reporting laboratory (ACMG variant classification criteria applied) |
|--------------------|----------|---------------------------------|------------------------------------------------|--------------------------------------------|--------------------------------|-------------|--------------------------------|------------------------------------------------------------------------------------------------|
| 23                 | RPGRIP1  |                                 | 2 years                                        | 24 years                                   | Homozygous                     | NM_020366.3 | c.2367+16>A p.(?)              | Likely pathogenic                                                                              |
| 84                 | RPE65    |                                 | 2 months                                       | 5 months                                   | Homozygous                     | NM_000329.2 | c.271C>T p.(Arg91Trp)          | Pathogenic                                                                                     |
| 92                 | RPE65    |                                 | 3 months                                       | 4 years                                    | Homozygous                     | NM_000329.2 | c.271C>T p.(Arg91Trp)          | Pathogenic                                                                                     |
| 105                | RDH12    |                                 | 7 years                                        | 60 years                                   | Compound Heterozygous          | NM_152443.2 | c.210dup p.(Arg71Glnfs*12)     | Pathogenic; pathogenic                                                                         |
| 107                | RDH12    |                                 | Unknown                                        | 40 years                                   | Presumed Compound Heterozygous | NM_152443.2 | c.671C>T p.(Thr244Ile)         | Pathogenic; variant of uncertain significance                                                  |
| 179                | RPE65    |                                 | 6 months                                       | 50 years                                   | Homozygous                     | NM_000329.2 | c.95-2A>T p.(?)                | Pathogenic                                                                                     |
| 185                | TULP1    |                                 | Since birth*                                   | 23 years                                   | Homozygous                     | NM_003322.4 | c.901C>T p.(Gln301*)           | Pathogenic                                                                                     |
| 186                | GUCY2D   |                                 | 4 months                                       | 6 months                                   | Homozygous                     | NM_000180.3 | c.2983C>T p.(R995Trp)          | Likely pathogenic                                                                              |
| 187                | CEP290   |                                 | 2 months                                       | 1 year                                     | Presumed Compound Heterozygous | NM_025114.3 | c.4723A>T p.(Lys1575*)         | Pathogenic; pathogenic                                                                         |
| 192                | GUCY2D   |                                 | Since childhood*                               | 33 years                                   | Homozygous                     | NM_000180.3 | c.656>A p.(Trp22*)             | Pathogenic                                                                                     |
| 233                | CRB1     |                                 | 11 months                                      | 11 months                                  | Compound Heterozygous          | NM_201253.2 | c.4039del p.(Thr1347Leufs*5)   | Pathogenic; likely pathogenic                                                                  |
| 235                | CEP290   |                                 | 5 months                                       | 7 months                                   | Presumed Compound Heterozygous | NM_025114.3 | c.164_167del p.(Thr555Serfs*3) | Pathogenic; pathogenic                                                                         |
| 236                | CRX      |                                 | 2 years                                        | 5 years                                    | Heterozygous                   | NM_000564.4 | c.4478dup p.(Ser156Leufs*24)   | Pathogenic                                                                                     |
| 238                | AIPL1    |                                 | 5 months                                       | 9 months                                   | Homozygous                     | NM_014336   | c.834G>A p.(Trp278*)           | Pathogenic                                                                                     |
| 243                | CEP290** | Joubert syndrome                | 11 months                                      | 7 years                                    | Presumed Compound Heterozygous | NM_025114.4 | c.1278del p.(Glu431Valfs*6)    |                                                                                                |
| 244                | CRB1     |                                 | Since birth*                                   | 11 years                                   | Homozygous                     | NM_201253.3 | c.1949G>A p.(Trp650*)          | Pathogenic                                                                                     |
| 246                | NMNAT1   |                                 | 6 months                                       | 10 years                                   | Presumed Compound Heterozygous | NM_022787.3 | c.6107>G p.(Trp204Gln)         | Pathogenic; likely pathogenic                                                                  |
| 248                | CRB1     |                                 | 3 months                                       | 5 months                                   | Homozygous                     | NM_201253.2 | c.1949G>A p.(Trp650*)          | Pathogenic                                                                                     |
| 249                | GUCY2D   |                                 | 7 months                                       | 11 months                                  | Compound Heterozygous          | NM_000180.3 | c.1978C>T p.(Arg660*)          | Pathogenic; pathogenic                                                                         |
| 250                | CEP290   |                                 | Since birth*                                   | 4 years                                    | Heterozygous                   | NM_025114.4 | c.2991+1655A>G p.(?)           | Pathogenic; pathogenic                                                                         |
| 251                | CEP290   |                                 | 3 months                                       | 10 months                                  | Presumed Compound Heterozygous | NM_025114.3 | c.2991+1655A>G p.(Cys998*)     | Pathogenic; pathogenic                                                                         |
| 275                | CEP290   |                                 | 1 year                                         | 24 years                                   | Compound Heterozygous          | NM_025114.3 | c.2213del p.(Leu738*)          | Pathogenic; pathogenic                                                                         |
| 276                | RPGRIP1  |                                 | 18 years                                       | 47 years                                   | Homozygous                     | NM_020366.3 | c.2302C>T p.(Arg768*)          | Pathogenic                                                                                     |
|                    |          |                                 |                                                |                                            |                                |             | c.295C>A p.(Leu991le)          |                                                                                                |
|                    |          |                                 |                                                |                                            |                                |             | c.6268C>T p.(Arg1090Cys)       |                                                                                                |
|                    |          |                                 |                                                |                                            |                                |             | c.2251C>T p.(Arg751*)          |                                                                                                |
|                    |          |                                 |                                                |                                            |                                |             | c.2570T>G p.(Leu857Arg)        |                                                                                                |
|                    |          |                                 |                                                |                                            |                                |             | c.2991+1655A>G p.(?)           |                                                                                                |
|                    |          |                                 |                                                |                                            |                                |             | c.555del p.(Lys185Asnfs*3)     |                                                                                                |
|                    |          |                                 |                                                |                                            |                                |             | c.769G>A p.(Glu257Lys)         |                                                                                                |
|                    |          |                                 |                                                |                                            |                                |             | c.1721G>A p.(Arg574His)        |                                                                                                |

\*Exact age unknown per chart review

\*\*Variants per clinical documentation only
